# Supplementary material for: Antibacterial Thermo-Sensitive Silver Hydrogel Nanocomposite Improves Wound Healing
Source: Preprints.org preprint supplement (doi:10.20944/preprints202306.0308.v1), 2023-06-05
Supplement: Supplementary file 1 [file supplementary]

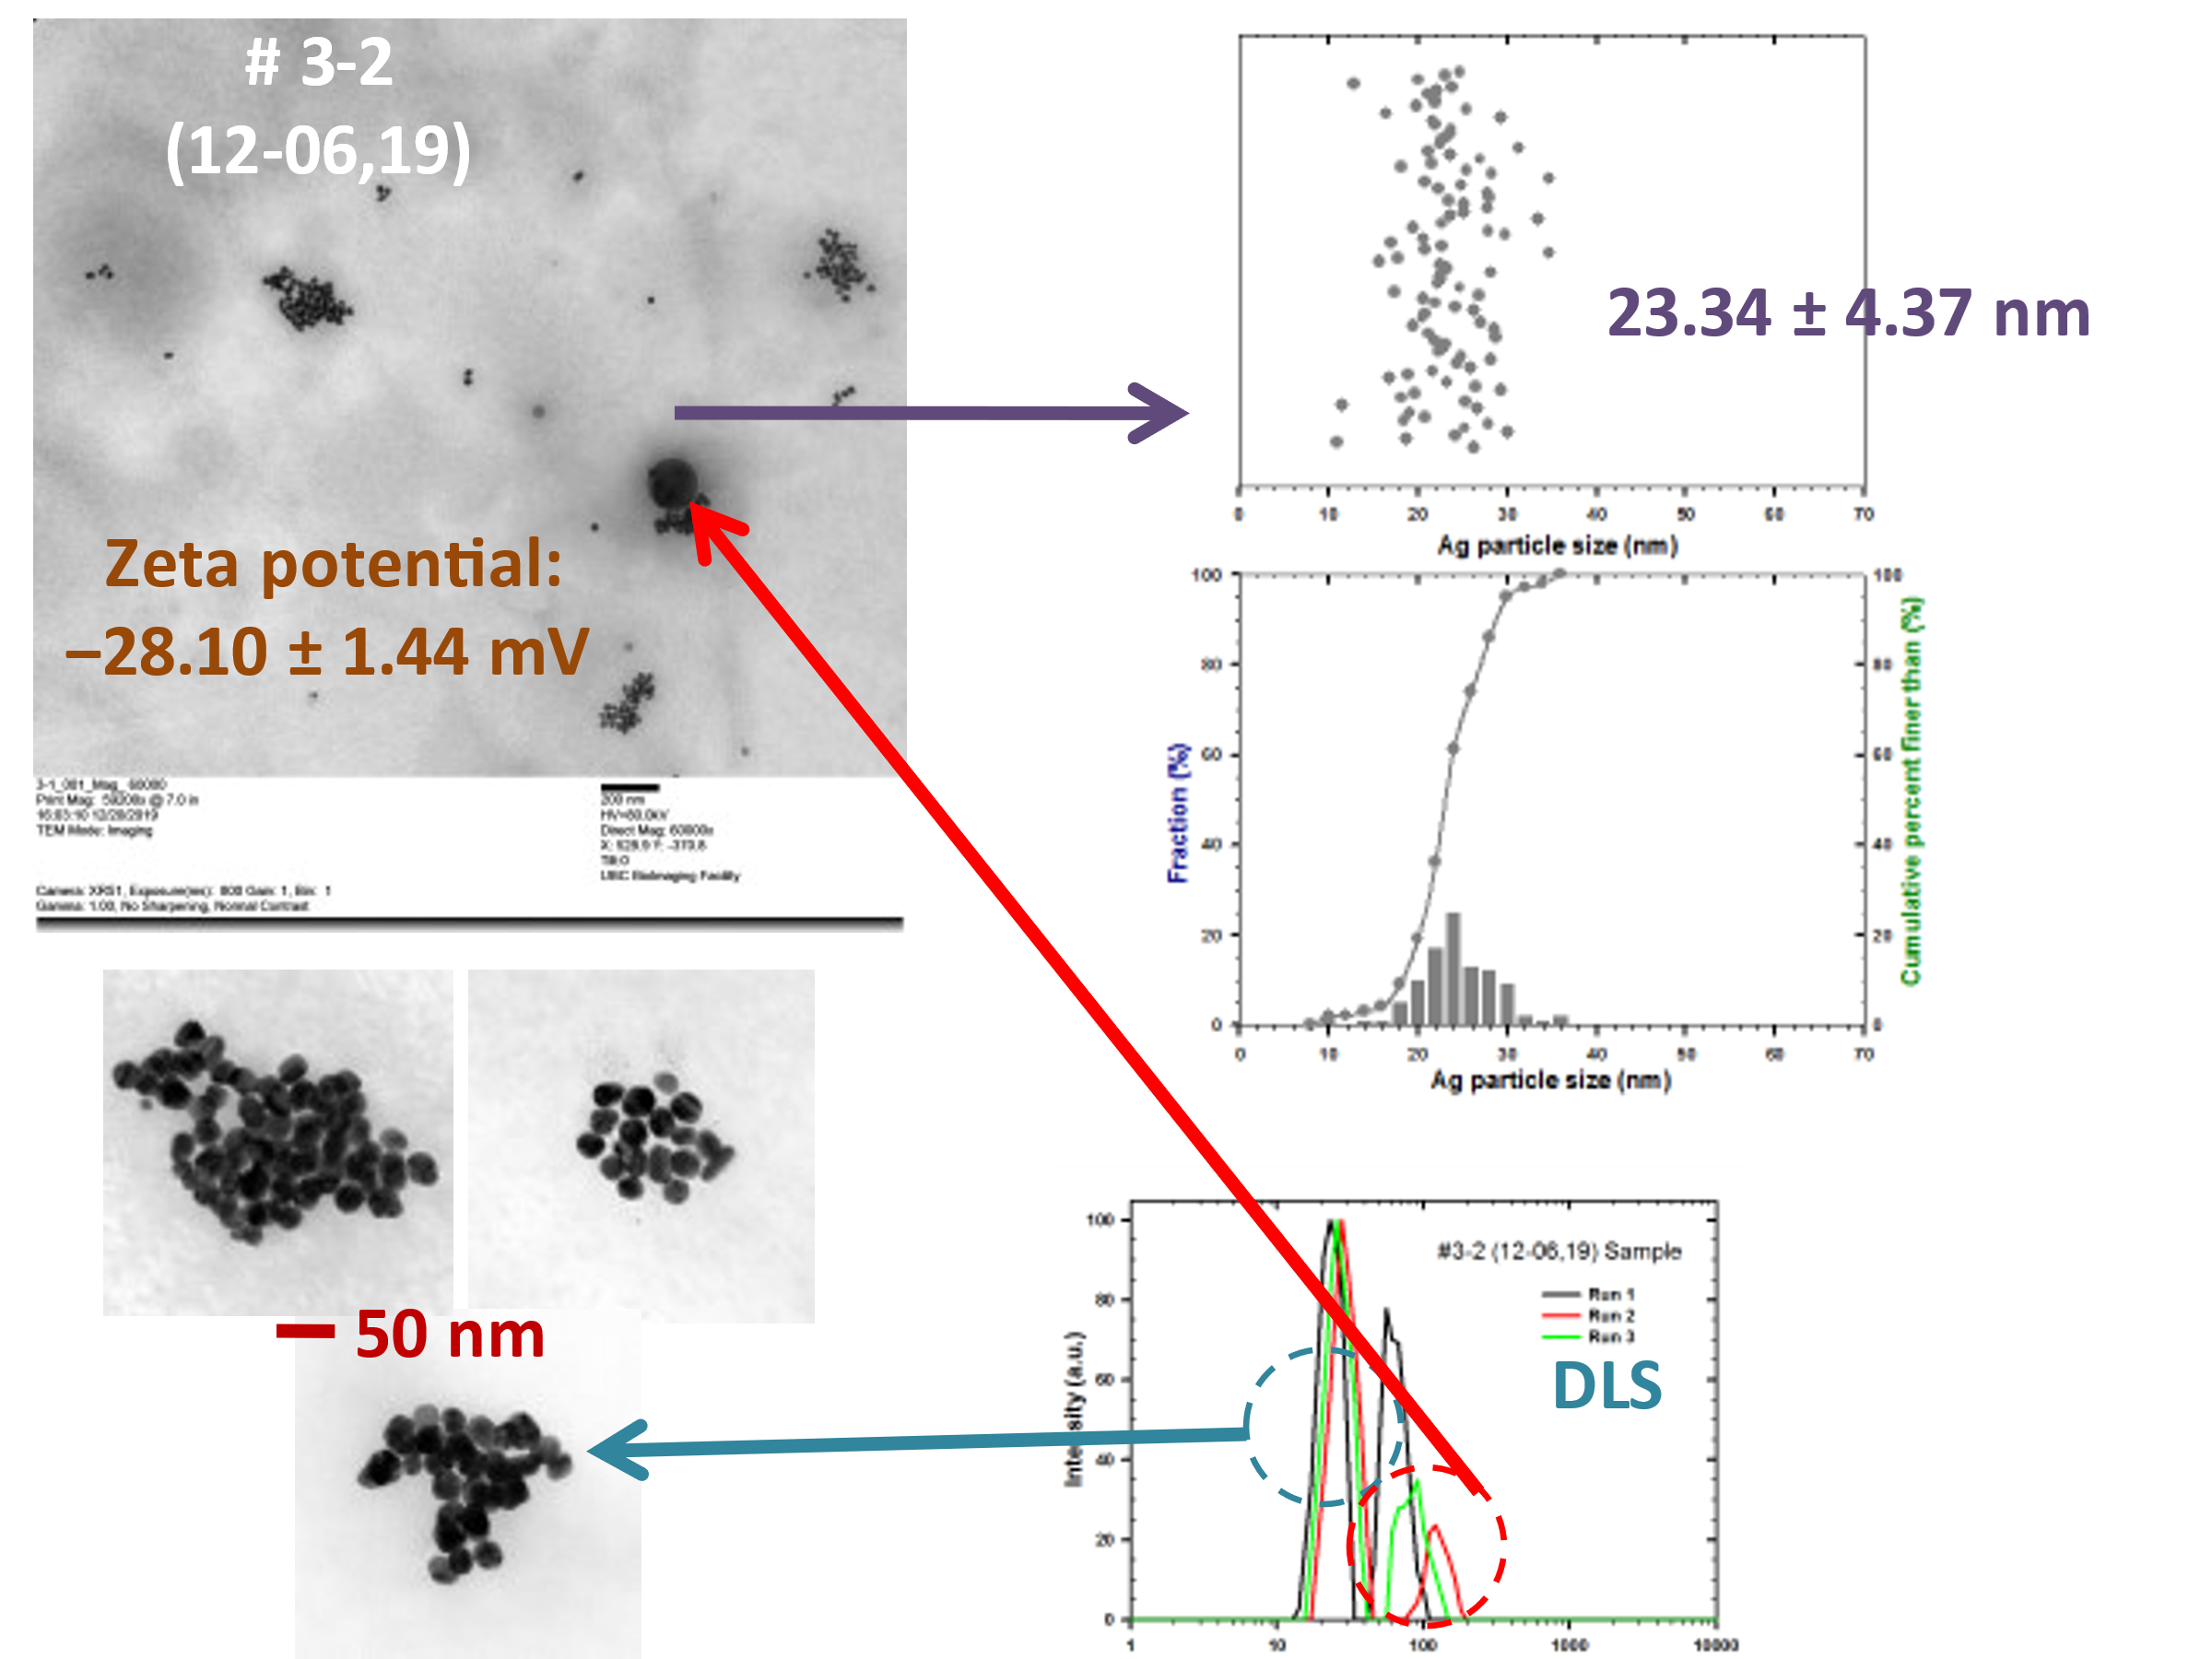


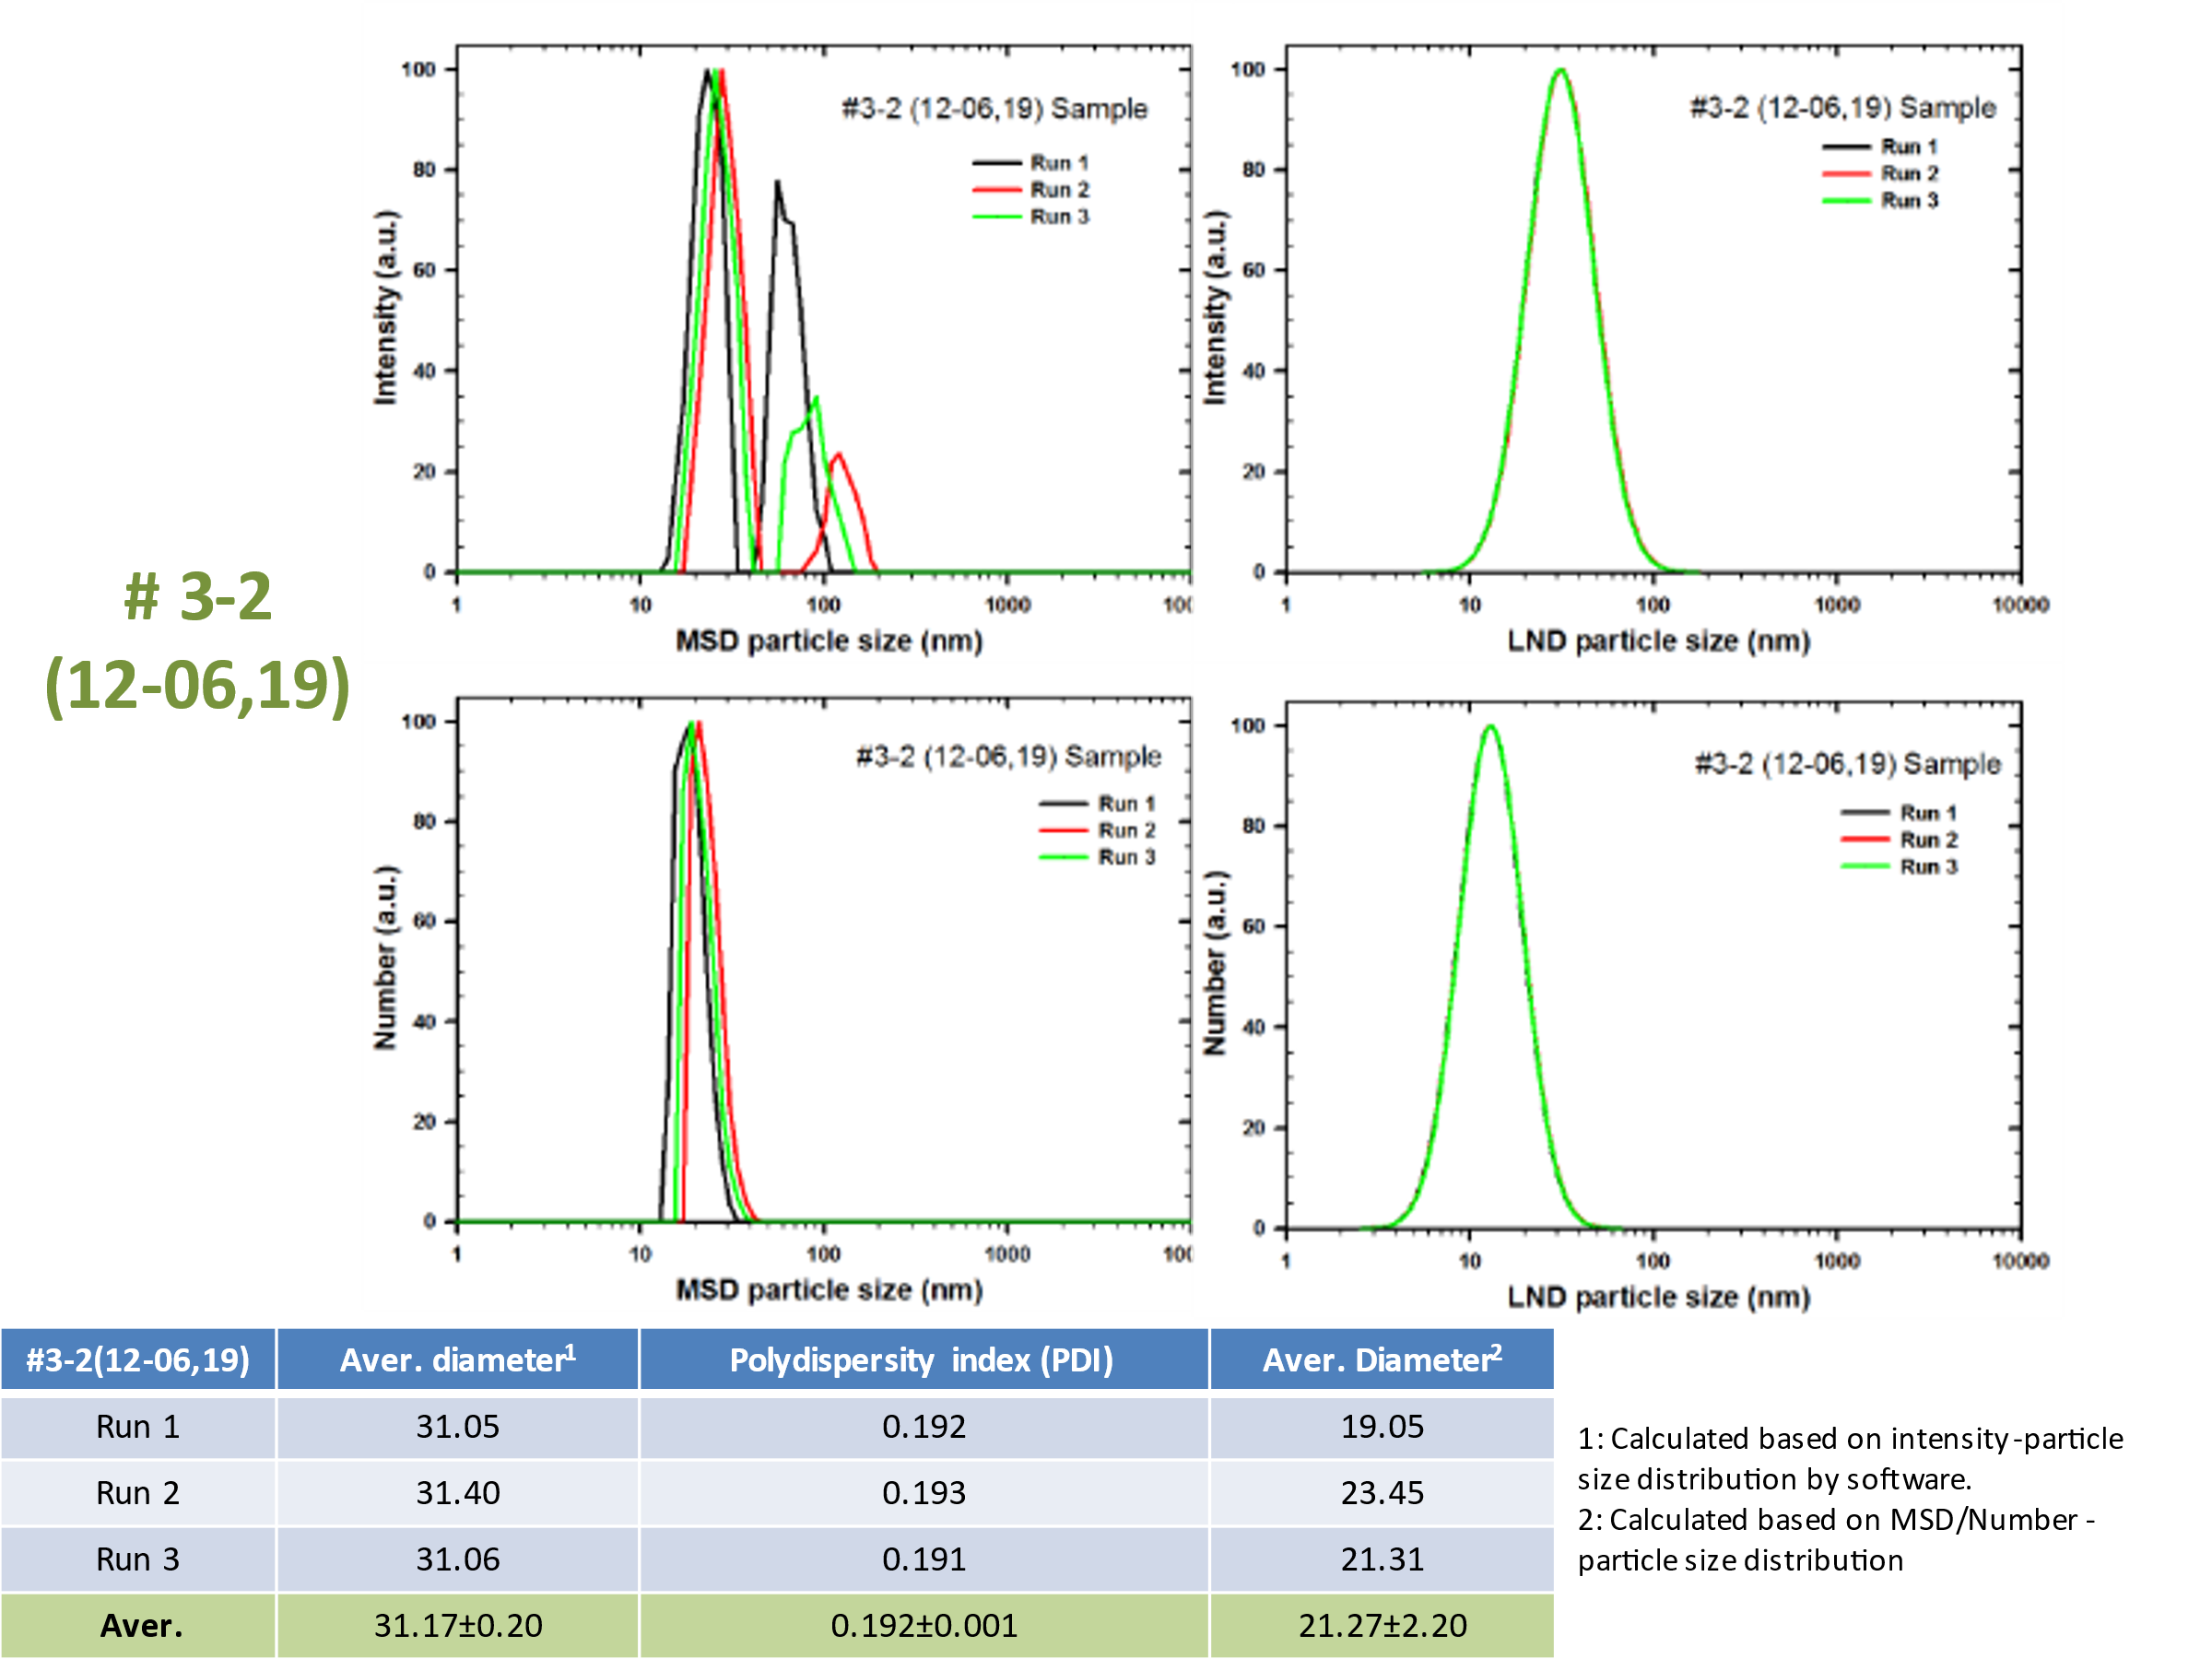


**Supplementary Data-1:** Dynamic Light Scattering (DLS) graphs and size measurement of silver nanoparticles. The particle size distributions (MSD: multimodal size distribution, LND: lognormal size distribution) are expressed using intensity-based and numerical-based calculations.
